# Supplementary material for: Influence of the Dry Yeast Preparation Method on Final Sparkling Wine Characteristics
Source: MDPI journal article supplement (doi:10.3390/fermentation8070313), 2022-06-30
Supplement: s1 [file s1]

**Table S1.** Acid concentrations of base wine and of the resulting sparkling wines fermented with *S. cerevisiae* strain *IOC18-2007* GPY-grown or *pied de cuve*-prepared, after 9 months aging. Acid concentrations were determined by HPLC and expressed in grams per liter.

| Acid              | Base wine                | GPY                      | <i>Pied de cuve</i>      |
|-------------------|--------------------------|--------------------------|--------------------------|
| <b>L-(-)malic</b> | 3.85±0.07 <sup>b</sup>   | 0.09±0.00 <sup>a</sup>   | 0.08±0.01 <sup>a</sup>   |
| <b>L-lactic</b>   | ND <sup>a</sup>          | 2.60±0.06 <sup>b</sup>   | 2.40±0.01 <sup>b</sup>   |
| <b>Tartaric</b>   | 5.55±0.07 <sup>c</sup>   | 3.60±0.04 <sup>b</sup>   | 3.17±0.001 <sup>a</sup>  |
| <b>Succinic</b>   | 0.4± (0.02) <sup>a</sup> | 0.59±0.00 <sup>b</sup>   | 0.54±0.01 <sup>b</sup>   |
| <b>Fumaric</b>    | ND <sup>a</sup>          | ND <sup>a</sup>          | ND <sup>a</sup>          |
| <b>Acetic</b>     | 0.13±0.0 <sup>a</sup>    | 0.212±0.071 <sup>a</sup> | 0.280±0.005 <sup>a</sup> |

Equal letters indicate the absence of statistically significant differences ( $P>0.05$ ). ND: not detected.
